# Supplementary material for: Gram-scale synthesis of aggregation-caused quenching-resistant red-emissive carbon dots for potential applications
Source: Royal Society of Chemistry journal article supplement (doi:10.1039/d4nj00321g), 2024-01-01
Supplement: d4nj00321g1.pdf [file d4nj00321g1.pdf]

## Supplementary Information

### Gram-scale synthesis of aggregation-caused quenching-resistant red-emissive carbon dots for potential applications

Ashok Kumar<sup>a</sup> Kanchan Negi<sup>a</sup> and Sumanta Kumar Sahu<sup>a\*</sup>

<sup>a</sup>Department of Chemistry and Chemical Biology, Indian Institute of Technology (ISM), Dhanbad 826004, Jharkhand, India.

\*Corresponding author. E-mail: [sumantchem@gmail.com](mailto:sumantchem@gmail.com), [sksahu@iitism.ac.in](mailto:sksahu@iitism.ac.in);

Fax: +91 326-2307772; Tel: +91 3262235936, +91 7631042241

---

#### CONTENTS:

**Figure S1.** XRD pattern of R-CDs.

**Figure S2.** TGA curve of R-CDs.

**Figure S3.** The luminous activity of composite films.

**Figure S4.** The optical characteristics of polymer composite films.

**Figure S5.** Latent fingerprints developed on different surfaces and their luminous activity in UV and visible light.

**Figure S6.** Photobleaching and photostability studies of R-CDs.

**Figure S7.** Development of fluorescent ink images and characters.

**Figure S8.** Confocal fluorescence images of HEK293T cell lines.

**Figure S9.** XPS survey of RTP-CDs.

**Table 1.** Summary of some reported carbon dot-based WLEDs with CCT, CIE, and CRI.

**Table 2.** Elemental compositions table for RTP-CDs and R-CDs.

**Figure S10.** High-resolution deconvolution spectra of C1s and O1s in RTP-CDs.

**Figure S11.** The digital photograph of phosphorescent materials at different time intervals.

**Figure S12.** The captured PL spectra at different currents and constant voltage.

**Figure S13.** The optical studies and characterizations of G-CDs.

**Figure S14.** Band gap calculation of R-CDs and G-CDs.

**Figure S15.** Temperature and ratio optimization studies of R-CDs.

1. XRD pattern of R-CDs.

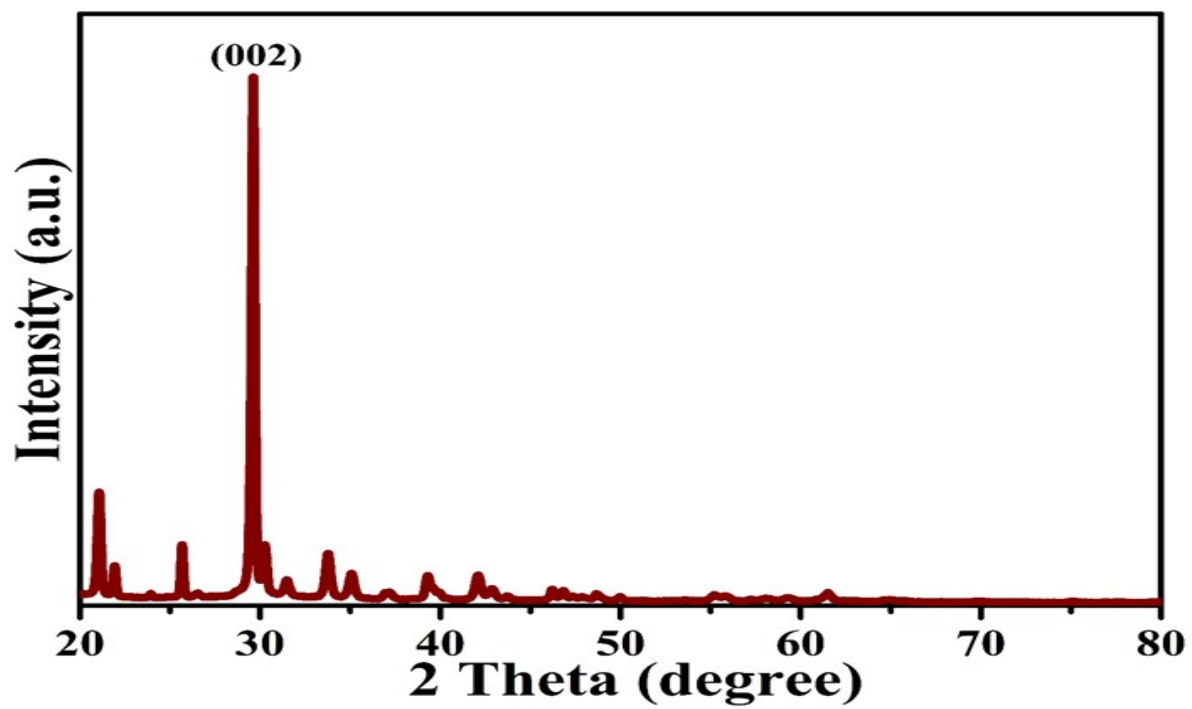

Figure S1. XRD pattern of R-CDs.

2. TGA curve of the R-CDs.

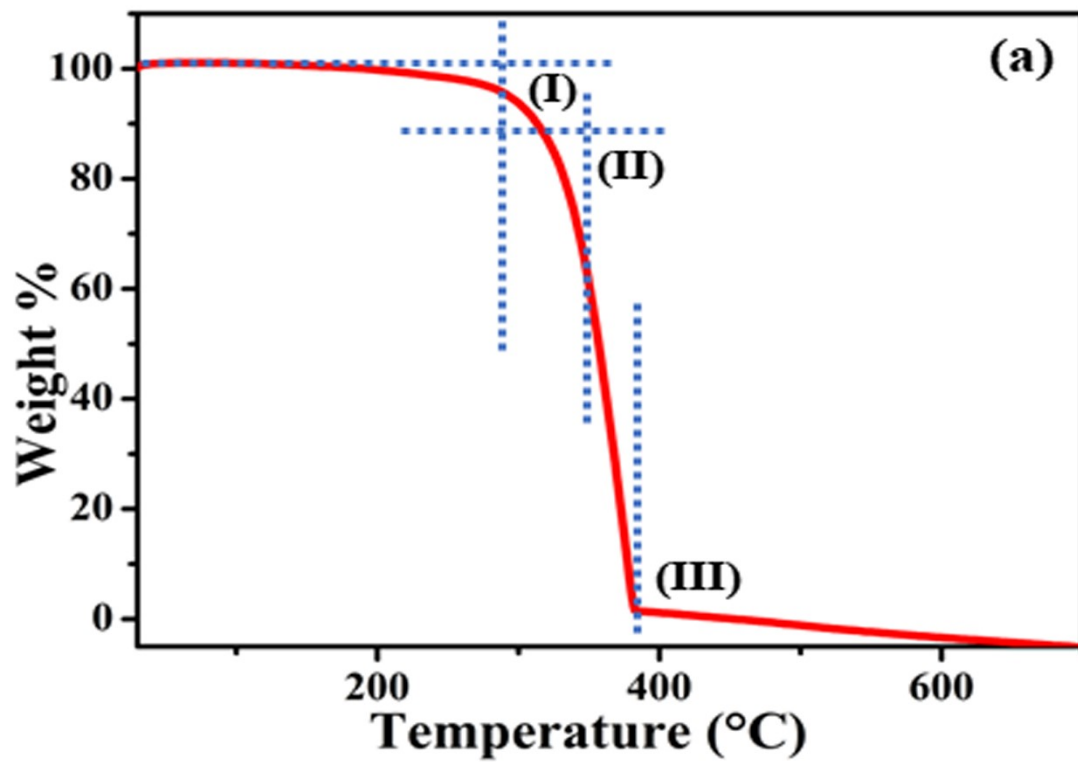

Fig

Figure S2. TGA curve of R-CDs.

### 3. The luminous activity of composite films.

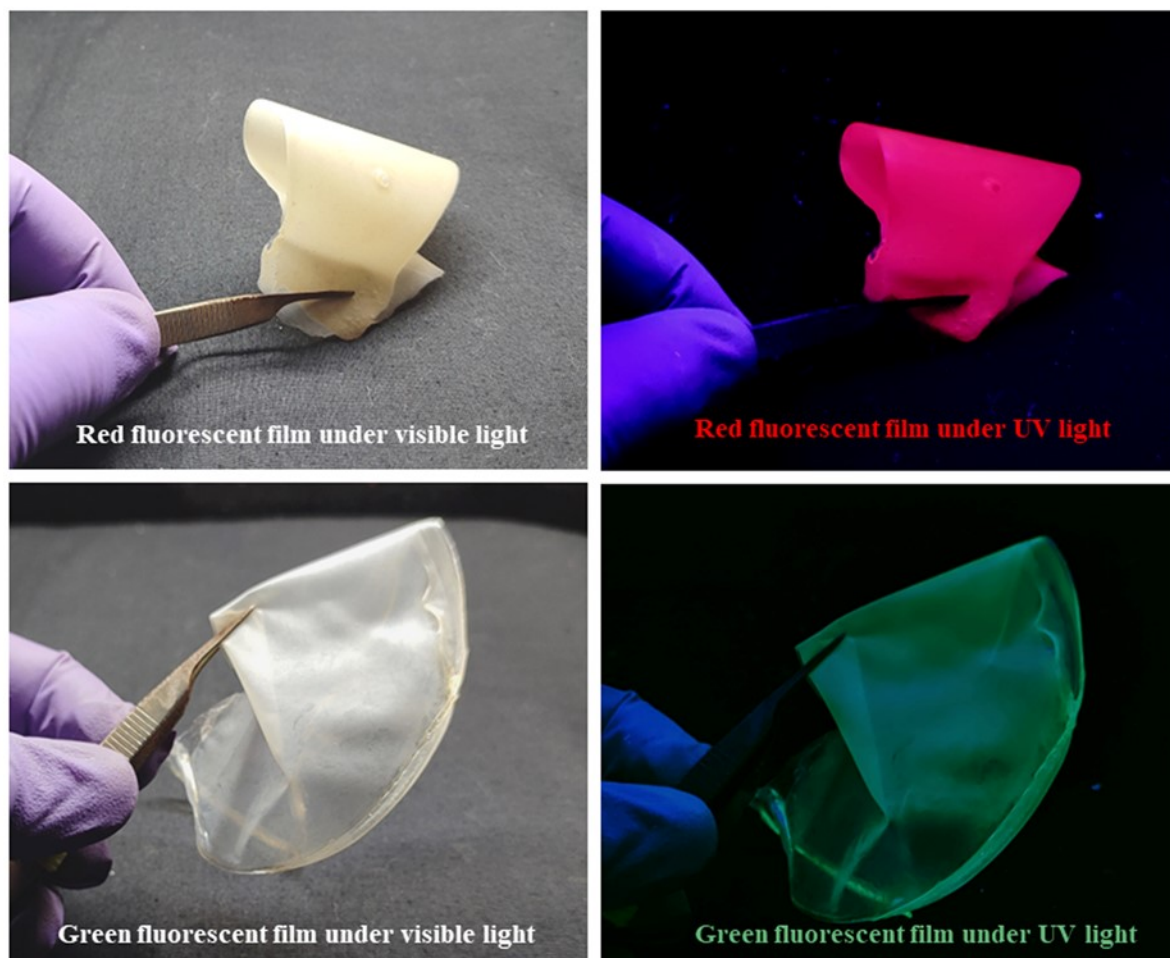

**Figure S3.** The luminous activity of R-CDs and G-CDs composite films by using visible and UV light.

#### 4. The optical characteristics of polymer composite films.

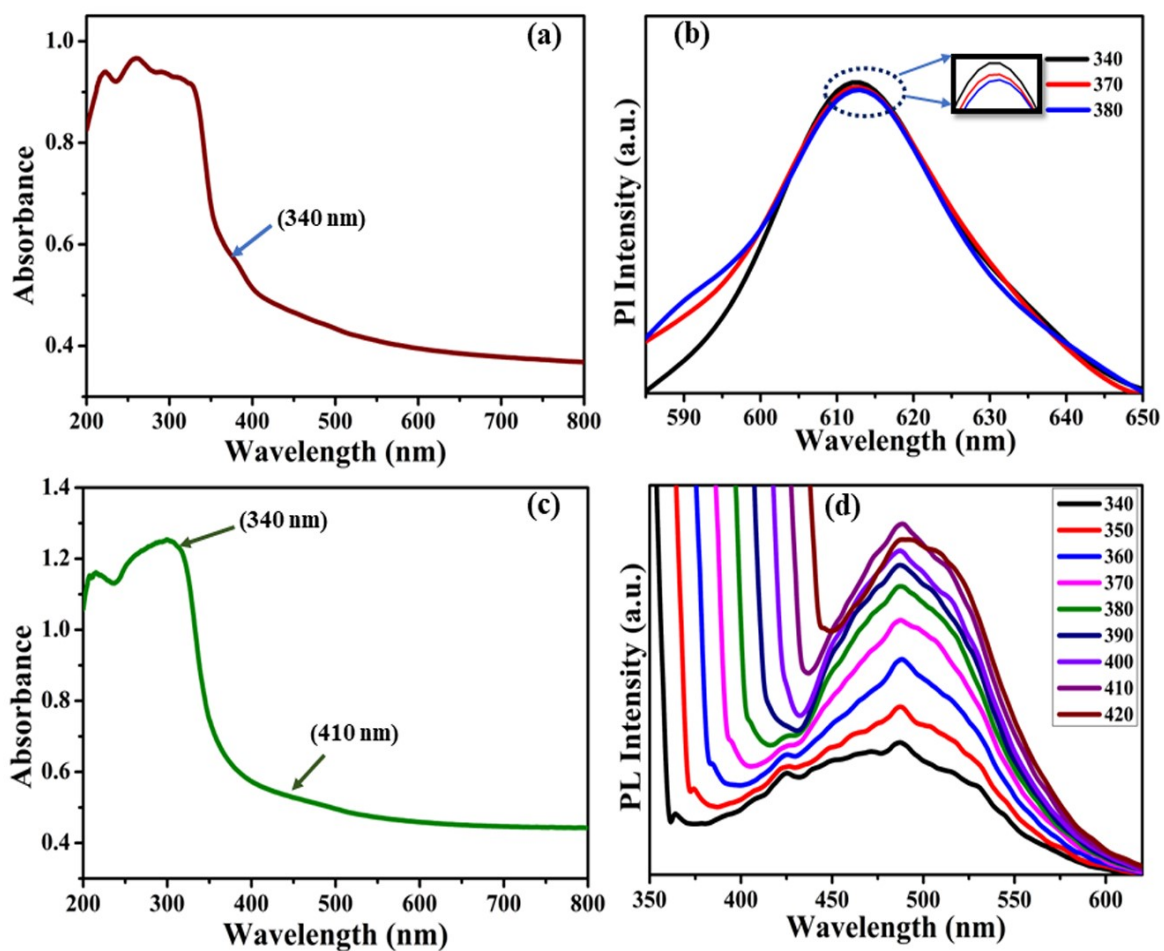

**Figure S4.** The optical behavior of the polymeric composite film: (a) the UV visible absorbance spectrum of R-CDs/PVA composite film (b) PL spectra of R-CDs/PVA (c) the UV visible absorbance spectrum of G-CDs/PVA composite film (b) PL spectra of G-CDs/PVA

**5. Latent fingerprints developed on different surfaces and their luminous activity in UV and visible light.**

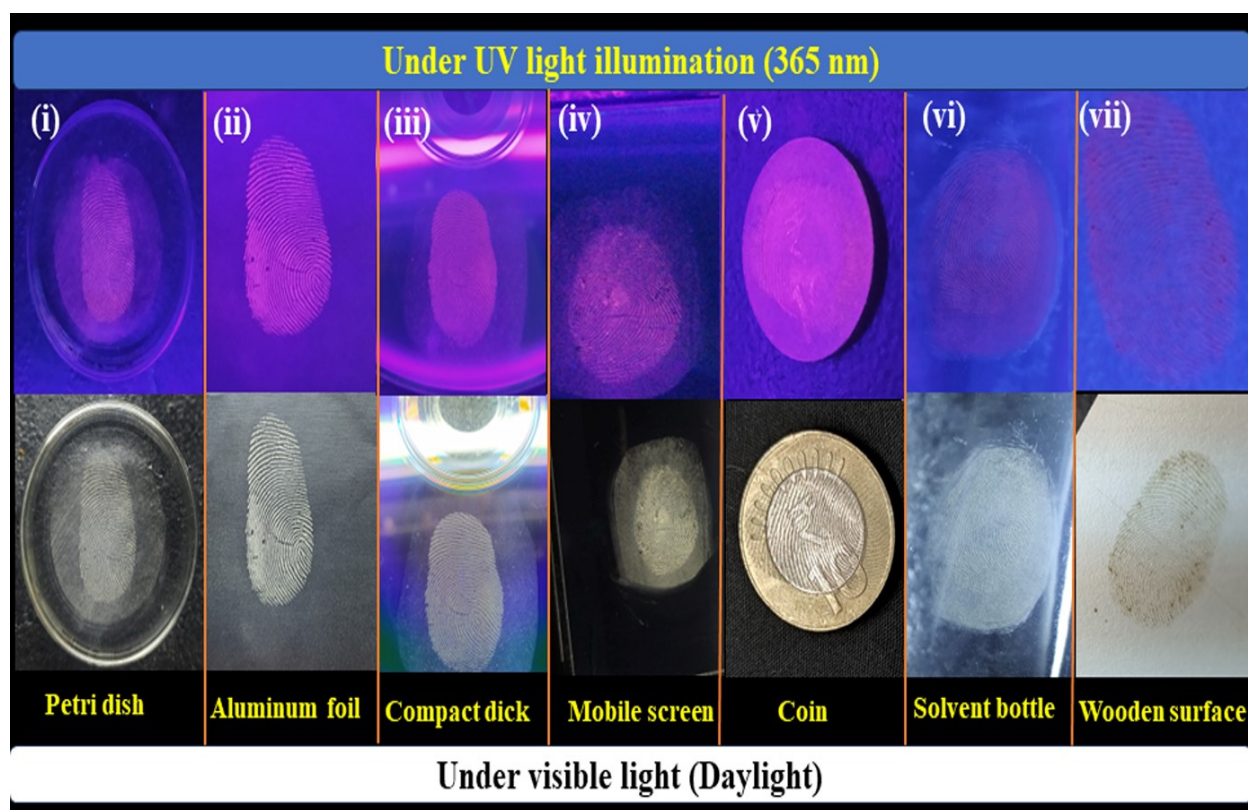

**Figure S5.** Latent fingerprint images developed with R-CDs and irradiated with 365 nm UV and visible light, the developed fingerprints on (i) a glass petri dish, (ii) aluminum foil, (iii) a compact disc glossy face (iv) mobile phone screen (v) coin (vi) plastic solvent bottle, and (vii) wooden surface.



## 6. Photobleaching and photostability studies of R-CDs.

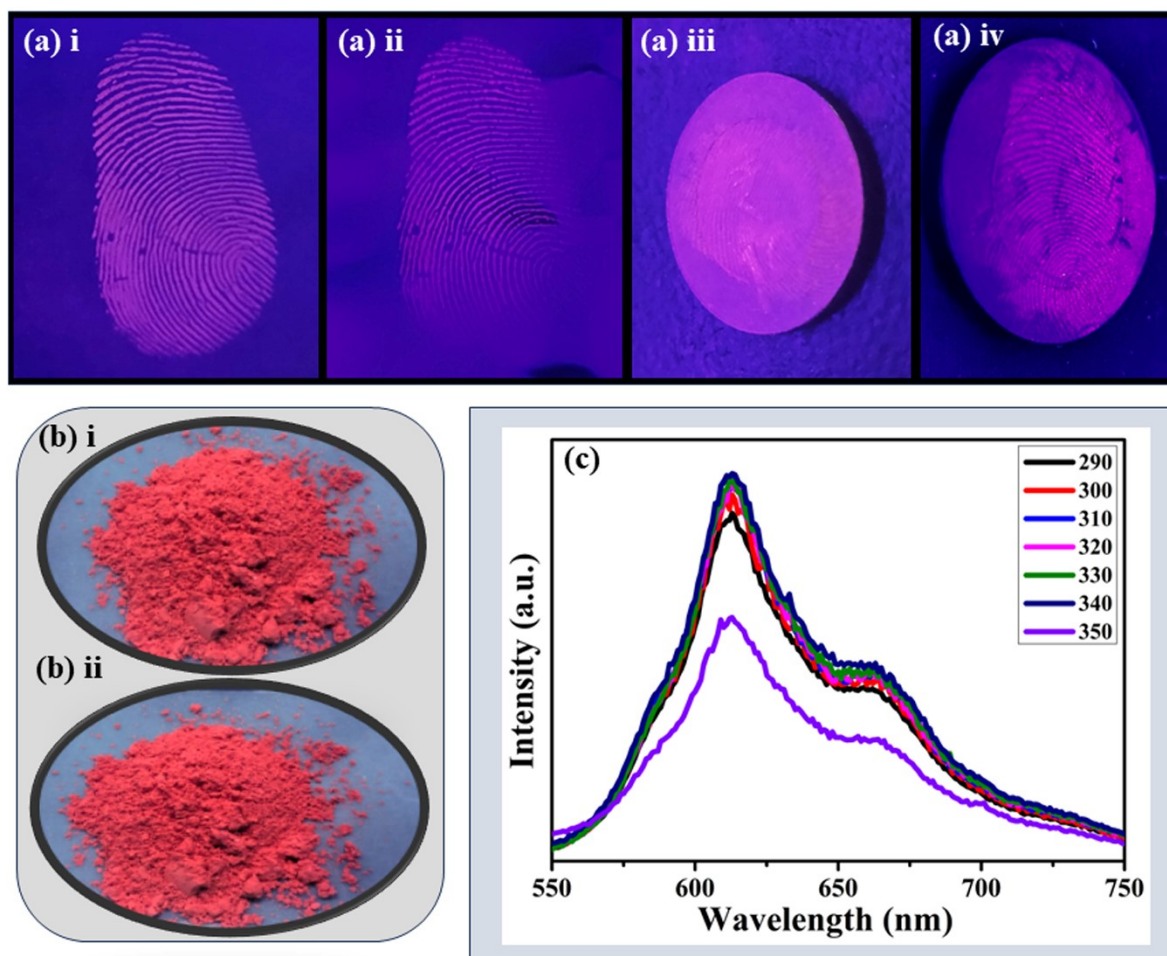

**Figure S6.** (a-i and a-iii) freshly developed fingerprints, and (a-ii and a-iv) after 12 weeks of storage (b-i) before irradiation under UV light, and (b-ii) after 1 hour of UV irradiation (c) the fluorescence emission spectra after three months of storage.



## 7. Development of fluorescent ink images and characters.

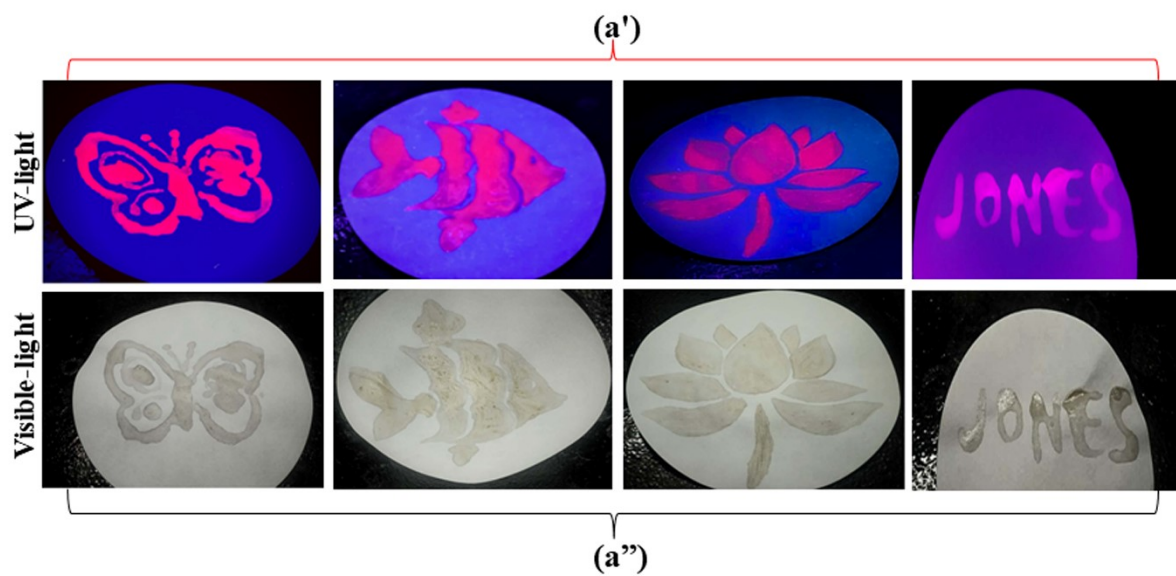

**Figure S7.** (a') fluorescent ink images and characters on commercial filter paper after 365 UV-light illumination, and (a'') visible light.

## 8. Confocal fluorescence images of HEK293T cell lines.

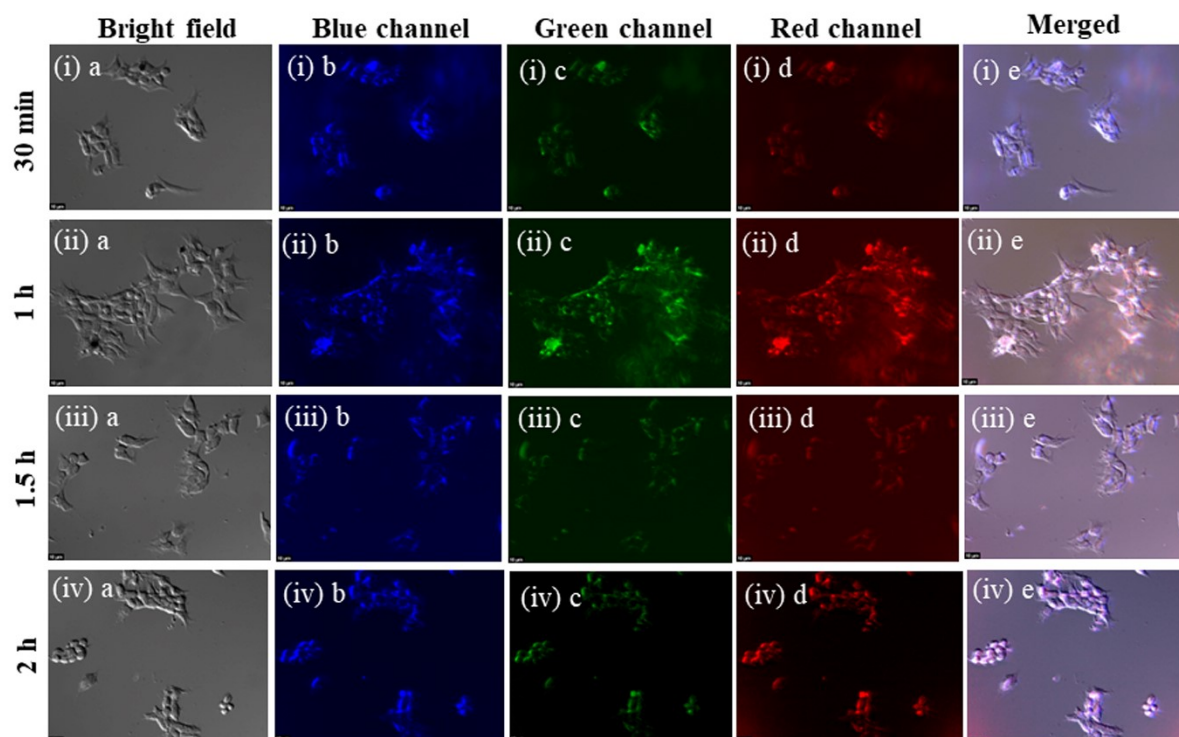

**Figure S8.** Confocal fluorescence images of HEK293T cell lines, cells treated with R-CDs ( $25 \mu\text{g mL}^{-1}$ ) for changed time intervals (i) 30 min, (ii) 1 h, (iii) 1.5 h, (iv) 2 h, and different channels (a) bright field (b) blue channel (c) green channel (d) red channel (e) merged (the scale bar is  $10 \mu\text{m}$ ).

## 9. XPS survey of RTP-CDs.

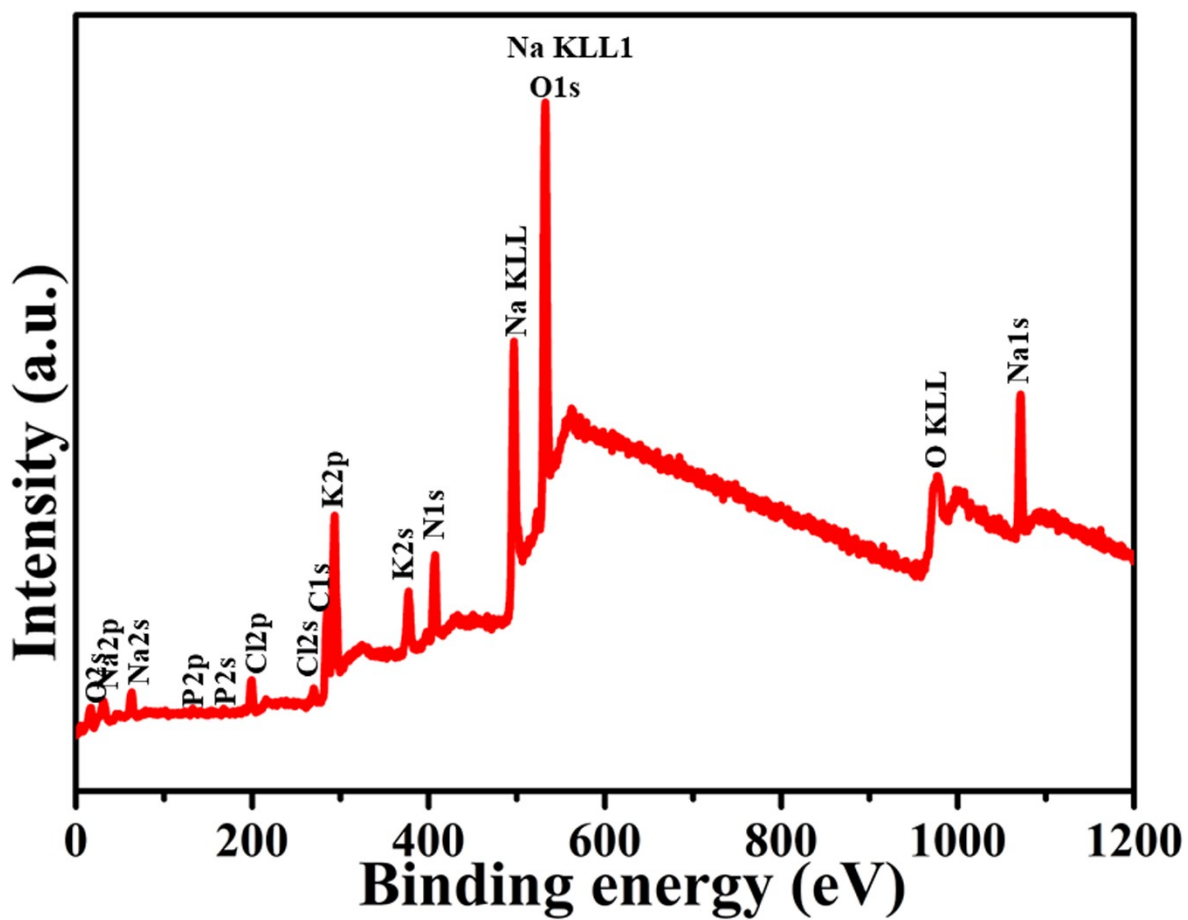

Figure S9. XPS survey of the synthesized RTP-CDs.

**Table 1. Summary of some reported carbon dot-based WLEDs with CCT, CIE, and CRI.**

| CCT    | CIE          | CRI       | References         |
|--------|--------------|-----------|--------------------|
| 5610 K | (0.33, 0.33) | 92        | [1]                |
| 5643 K | (0.31, 0.29) | 87        | [2]                |
| 6987 K | (0.30, 0.35) | 83        | [3]                |
| 3723 K | (0.39, 0.37) | 91        | [4]                |
| 5612 K | (0.33, 0.33) | 89        | [5]                |
| 7694 K | (0.29, 0.33) | 83        | [6]                |
| 4033 K | (0.38, 0.38) | <b>96</b> | <b>[This work]</b> |

**Table S1.** Summary of some reported carbon dot-based WLEDs with CCT, CIE, and CRI.

**Table 2. Elemental compositions table for RTP-CDs and R-CDs.**

Elemental compositions of RTP-CDs.

| Elements | O    | C    | N    | Na   | K   | Cl  | P   | N/C  | O/C  |
|----------|------|------|------|------|-----|-----|-----|------|------|
| %        | 49.1 | 18.6 | 11.5 | 10.1 | 7.9 | 2.2 | 0.6 | 0.61 | 2.63 |

Elemental compositions of R-CDs.

| Elements | O     | C     | N     | S    | N/C  | O/C  |
|----------|-------|-------|-------|------|------|------|
| %        | 22.56 | 66.70 | 10.55 | 0.19 | 0.15 | 0.33 |

**Table S2.** Elemental compositions of RTP-CDs and R-CDs.

## 10. High-resolution deconvolution spectra of C1s and O1s in RTP-CDs.

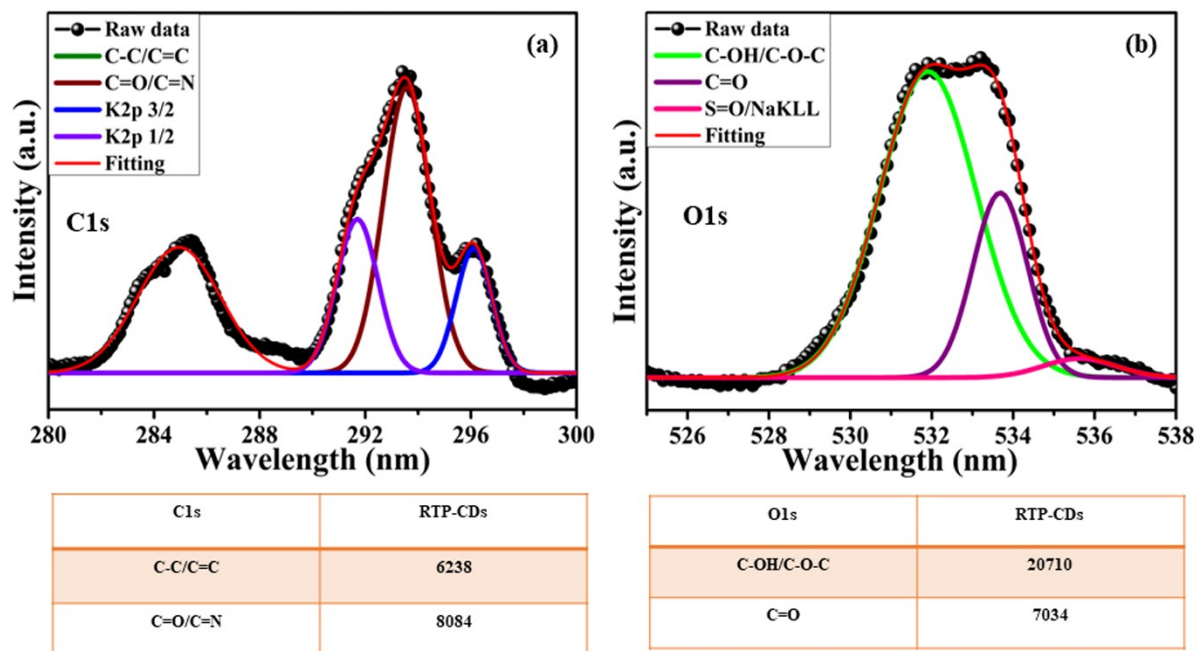

**Figure S10.** XPS high-resolution deconvolution spectra of C1s and O1s and corresponding area values in the table.

## 11. The digital photograph of phosphorescent materials at different time intervals.

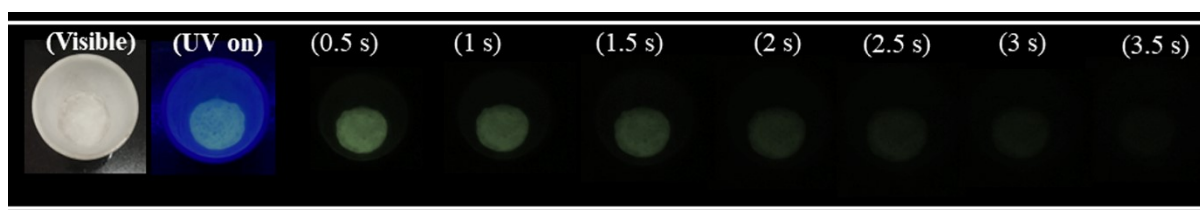

**Figure S11.** The digital photograph of RTP-CDs at diverse time intermissions with visible light on, UV source on and off.

## 12. The captured PL spectra at different currents and constant voltage.

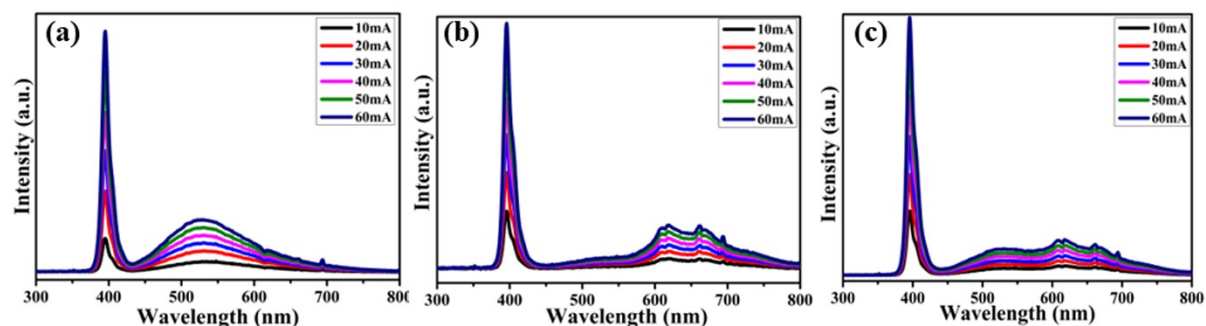

**Figure S12.** The PL emission spectra of the (a) G-CDs/PVA (b) R-CDs/PVA, and (c) WLEDs at different currents and a constant voltage of 4.5 V.

### The preparation and characterizations of G-CDs.

A specific amount of R-CDs was dissolved in 20 ml ultrapure water and sonicated with a sonicator bath for 30 minutes. After the sonication time, the pH was adjusted from 7.4 (ultrapure water) to 12 using 0.1 M NaOH solution, we got G-CDs. We checked the optical characteristics of G-CDs via UV-vis absorbance and fluorescence spectroscopy. **Figure S13(a)** exhibits the UV-vis absorption spectrum. The UV-visible absorbance shows two peaks at 300 and one small peak at 340 nm, corresponding to the  $\pi$ - $\pi^*$  transitions of the C=C bonds and n- $\pi^*$  transitions of C=O/C=N/C=S bonds. Again, to know the emission of G-CDs we checked the fluorescence spectra of the G-CDs upon various excitation wavelengths. **Figure S13(b)** depicts the fluorescence spectra of G-CDs. The PL spectra show that the highest emission occurs at 455 nm under the 340 nm optimum excitation. The PL emission peak was shifted to a higher wavelength with the increase of excitation wavelength, this phenomenon is plausible due to the presence of diverse particle sizes present in the G-CDs solution. Furthermore, FTIR spectroscopy and XPS measurements were performed to analyze the surface structure and functional groups of the CDs. **Figure S13(c)** represents the FTIR

spectrum of the G-CDs. A broad, prominent peak appears in this spectrum between 3000 and 3500  $\text{cm}^{-1}$ , showing the existence of a large number of O-H/N-H groups on the surface of CDs. [3]

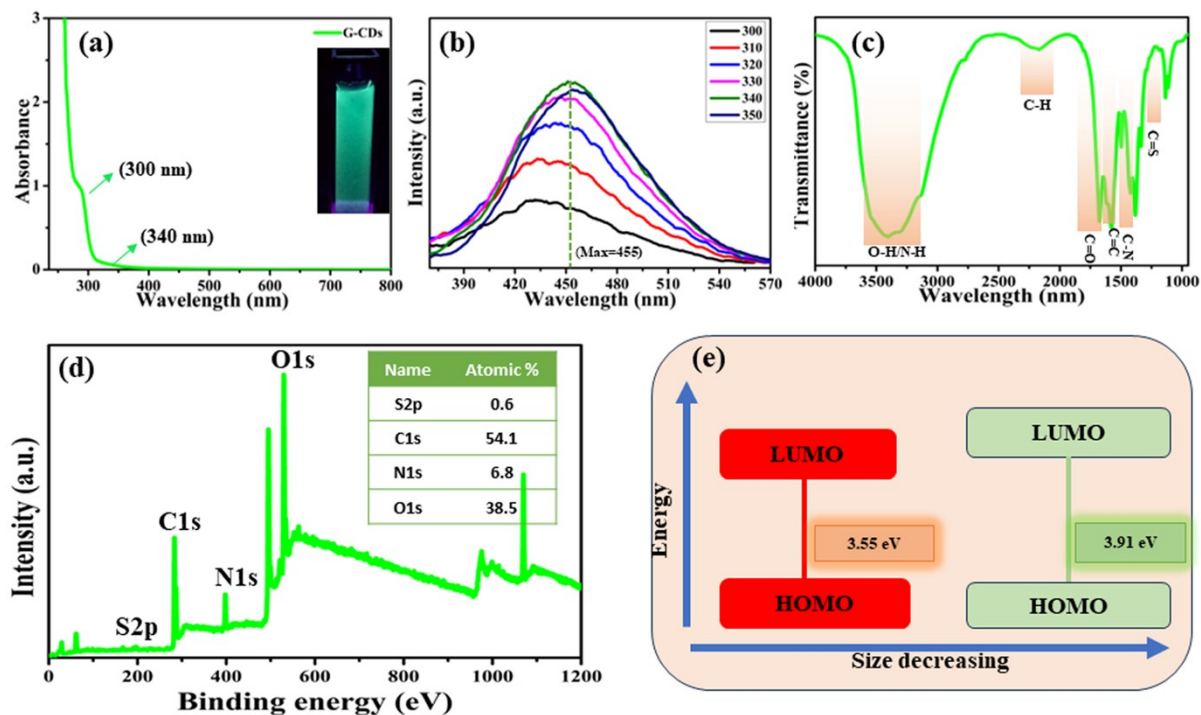

**Figure S13.** (a) UV-visible absorbance spectrum of G-CDs (b) PL spectra of G-CDs (c) FTIR spectrum of G-CDs (d) XPS survey of the G-CDs [Inset: Atomic % of the elements] (e) HOMO-LUMO diagram of the R-CDs and G-CDs.

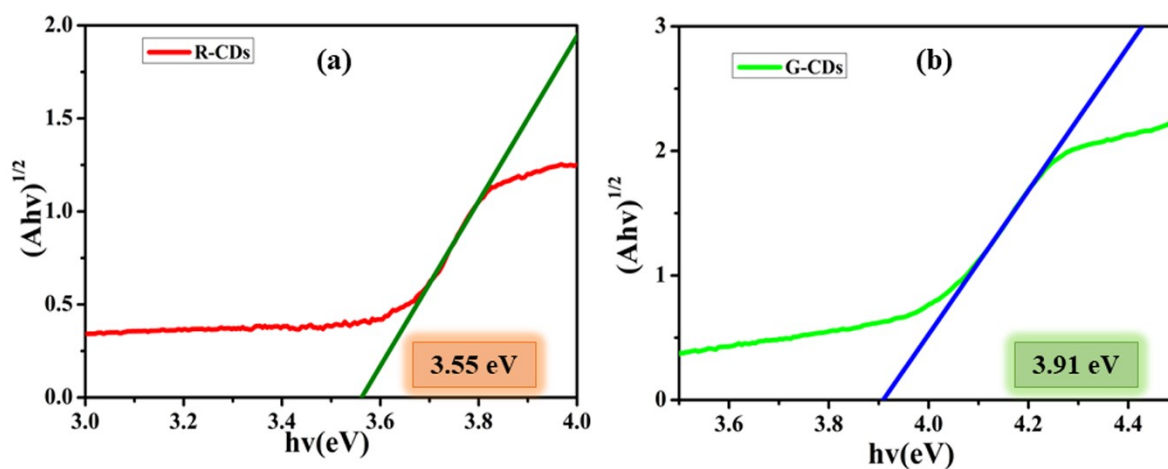

**Figure S14.** (a) Band gap of the R-CDs, and (b) G-CDs.



The absorption peaks at 2184, 1680, 1577, 1379, and 1272  $\text{cm}^{-1}$  were attributed to the stretching vibrations of C-H, C=O, C=C, C-N, and C=S groups, respectively. [3-6] These functional groups show that the various functional groups were present on the surface of G-CDs which govern their hydrophilicity and good stability in aqueous solutions. Additionally, X-ray photoelectron spectroscopy (XPS) was utilized to confirm these chemical compositions of G-CDs. The atomic proportions of C, N, O, and S elements were revealed to be 54.1%, 6.8%, 38.5%, and 0.6%, respectively, in a full survey scan spectra of the XPS (**Figure S13(d)**). Now, we compare R-CDs with G-CDs using FTIR and XPS measurements. **Table S2** shows the atomic percentage of both CDs. Here, we see that the percentage of oxygen is increased in the G-CDs and the nitrogen percentage is decreased. This phenomenon proves that some of the bonds containing nitrogen functional groups are converted into oxygen-containing groups. Further, we see that the FTIR spectrum of R-CDs gives a small intensity peak whereas the FTIR spectrum of G-CDs shows a broad, prominent peak which confirms the high number of hydroxyl groups present on the surface of G-CDs. The possible explanation behind this formation of G-CDs is the disruption of the highly conjugated anhydride system of R-CDs in the presence of excess hydroxyl ions at pH 12. This disruption caused to change in the surface state and widened the HOMO-LUMO gap, which resulted in the green color emission. The HOMO-LUMO gap is calculated based on UV-visible spectrum which is shown in **Figure S14(a-b)**, and the detailed diagram is shown in **Figure S13(e)**.

#### **References: -**

1. Y. Zhai, Y. Wang, D. Li, D. Zhou, P. Jing, D. Shen and S. Qu, *J. Colloid Interface Sci.*, 2018, **528**, 281-288.

2. Z. Sun, F. Yan, J. Xu, H. Zhang and L. Chen, *Nano Res.*, 2022, **15**, 414-422.
3. X. Feng, K. Jiang, H. Zeng and H. Lin, *Nanomaterials (Basel)*, 2019, **9**, 725.
4. Q. Han, W. Xu, C. Ji, G. Xiong, C. Shi, D. Zhang, W. Shi, Y. Jiang and Z. Peng, *ACS Appl. Nano Mater.*, 2022, **5**, 15914-15924.
5. W. Cai, T. Zhang, M. Xu, M. Zhang, Y. Guo, L. Zhang, J. Street, W.-J. Ong and Q. Xu, *J. Mater. Chem. C Mater. Opt. Electron. Devices*, 2019, **7**, 2212-2218.
6. J. Xu, Y. Miao, J. Zheng, H. Wang, Y. Yang and X. Liu, *Nanoscale*, 2018, **10**, 11211-11221.

### 15. Temperature and ratio optimization studies of R-CDs.

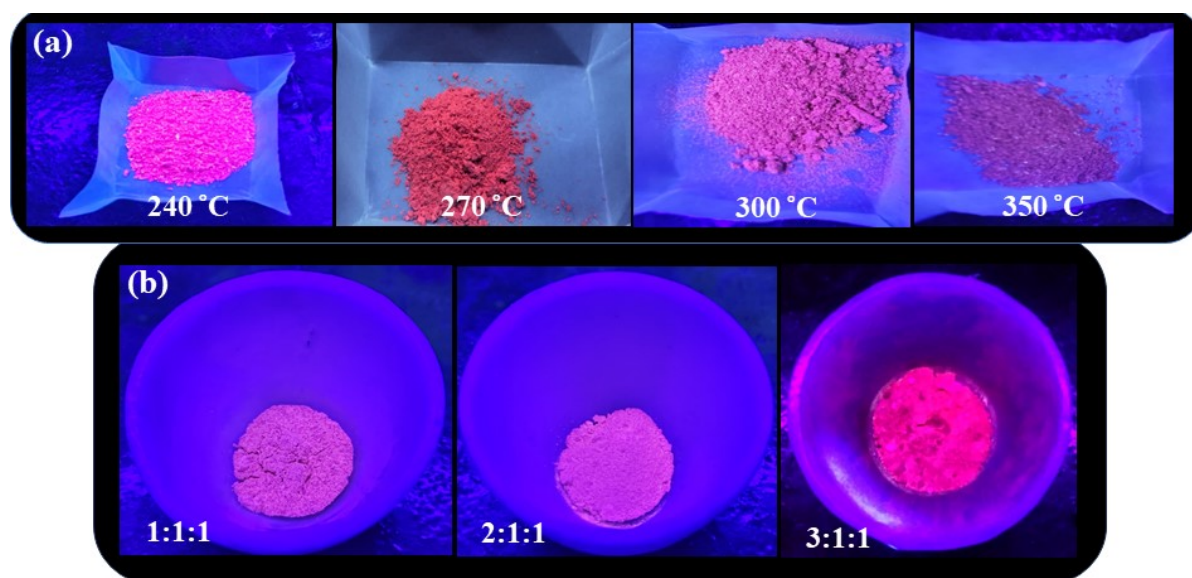

**Figure S15.** Temperature and ratio optimization studies of R-CDs (a) R-CDs were synthesized at different temperatures such as 240 °C, 270 °C, 300 °C, and 350 °C, here, we see

that at lower temperatures (240 °C) the precursors are not properly calcined whereas at higher temperatures 300 and 350 °C carbon depositions increase. (b) different ratio optimizations of precursors.
